# Supplementary material for: Genomic assembly, characterization, and quantification of DICER-like gene family in Okra plants under dehydration conditions
Source: PeerJ. 2023 Nov 21;11:e16232. doi: 10.7717/peerj.16232 (PMC10668803; doi:10.7717/peerj.16232)
Supplement: Supplemental Information 1 [file peerj-11-16232-s001.xlsx]

## Sheet: Primer List Table S1
Primer code	Forword	Primer code	Reverse	Gene Name
Q PP1F	TTCCGAGGAAAGAGGGCTAT	Q PP1R	TTGCAGCTCAACTCAACACC	AeDCL1
Q PP2F	ACTTCCGGGGTTTATCCGTG	Q PP2R	TTTGCATTACACAGTGTTTCCTCA	AeDCL2
Q PP4F	TCTGCTGTTAGCCTCATCCA	Q PP4R	GAACGGCTGCATTAACAGGT	AeDCL3
Q PP6F	TTATTCAAGCTGGCAACAAGG	Q PP6R	CAAATTACTGGGCAGGGATG	AeDCL4
